# Supplementary material
Source: publisher site journal article supplement (https://www.spandidos-publications.com/3213/downloadSupplementary)

Figure S1. Plasma levels of cytokine expression before POEM. (A) Plasma levels of cytokine expression in females and males. (B) Plasma levels of IL-10 expression in the controls, and be patients had and had not received previous treatment. \*P<0.05. FGF2, fibroblast growth factor 2; CSF3, colony stimulating factor 3; CCL, chemokine (C-C motif) ligand; IL, interleukin; VEGF, vascular endothelial growth factor; POEM, peroral endoscopic myotomy; +, had received previous treatment; -, had not received previous treatment.

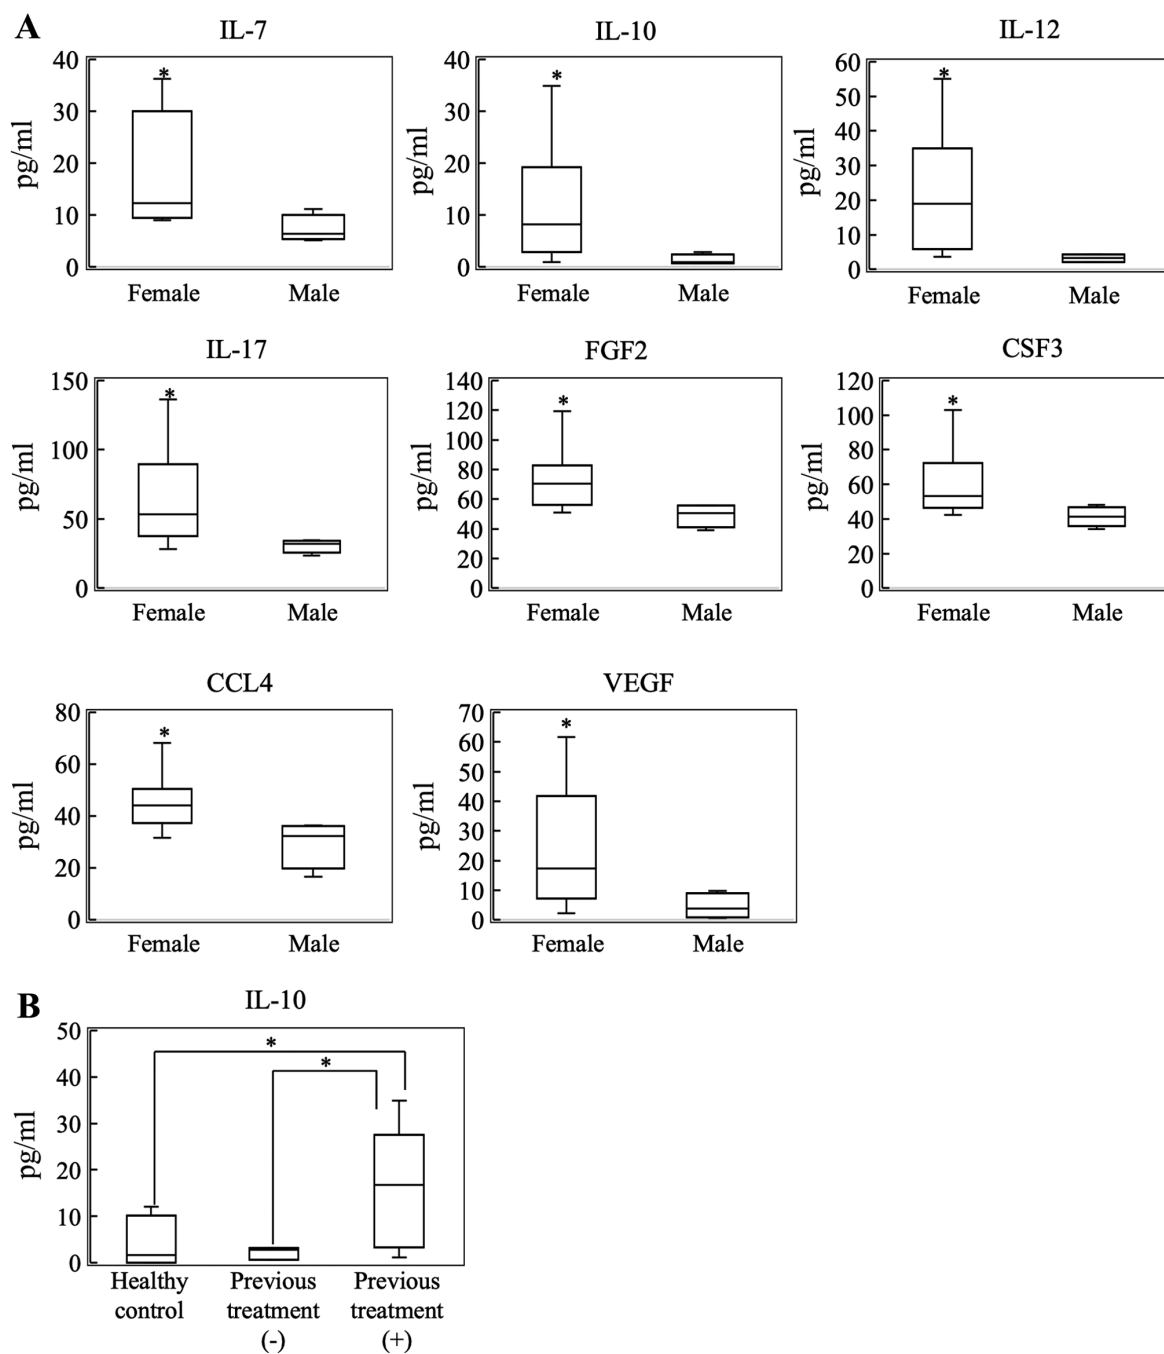

Supplement: Supplementary file 1 [file downloadSupplementary]
